# Supplementary material for: Sex differences in acute delta-9-tetrahydrocannabinol (Δ9-THC) response and tolerance as a function of mouse strain
Source: Springer Nature journal article supplement (doi:10.1007/s00213-023-06421-8), 2023-07-29
Supplement: MOESM1 [file 213_2023_6421_MOESM1_ESM.pdf]

**Manuscript Title:** Sex differences in acute delta-9-tetrahydrocannabinol ( $\Delta^9$ -THC) response and tolerance as a function of mouse strain

**Authors:** Courtney F Lulek, Malabika Maulik, Swarup Mitra, Josée Guindon, Daniel J Morgan, Angela N Henderson-Redmond

**Journal:** Psychopharmacology

**Affiliation Corresponding Author:** Department of Biomedical Sciences, Marshall University, Huntington, WV 25755

**Corresponding Author email:** redmonda@marshall.edu

### Supplementary Table 1 Sex-differences in acute antinociception and hypothermia in B6 mice receiving vehicle

Data represent the Means and SEM (standard error of the mean) in Percent Maximum Possible Effect (%MPE) for Tail Flick (A) and Percent Change in Body Temperature (%ΔBT) for Hypothermia (B) in B6 Mice. For the first two columns (PRE VEH), the mean and SEM for each sex is given for each dose following the administration of vehicle (VEH only) with the p value comparing sex within each dose listed to the right. For the next set of columns, the mean and SEM for mice getting THC (0-100 mg/kg; PRE THC) is listed with the P value to the right comparing sex within each dose with subsequent sets of p values comparing naïve mice getting VEH to those getting THC within each sex. Following seven days of once-daily treatment with vehicle (VEH) or 30 mg/kg THC, all mice were tested across a range of doses (0-130 mg/kg) of THC to generate post (POST) dose-response curves. The mean and SEM for each dose is listed for mice that received vehicle for 7 days prior to being assessed for the post dose-response curve of THC. P values assess sex differences in the post dose-response curve within each dose and within each sex compare differences between Pre and Post curves in VEH mice. \*Significant differences are italicized; lines denote instances where values or comparisons are not applicable

#### 1A. B6 Tail-flick

| Dose | PRE VEH Males (N=5) | PRE VEH Females (N=5) | PRE VEH/Sex P value | Pre THC Males (N=12) | Pre THC Females (N=13) | PRE THC/Sex P value | PRE Male VEH/THC P value | PRE Female VEH/THC P value | Post VEH Males (N=2) | Post VEH Females (N=2) | POST VEH/Sex P value | Pre/Post Male VEH P value | Pre/Post Female VEH P value |
|------|---------------------|-----------------------|---------------------|----------------------|------------------------|---------------------|--------------------------|----------------------------|----------------------|------------------------|----------------------|---------------------------|-----------------------------|
| 0    | -3.828<br>(2.629)   | -2.182<br>(2.622)     | >0.9999             | -0.903<br>(2.488)    | 1.031<br>(1.483)       | >0.9999             | >0.9999                  | >0.9999                    | -7.590<br>(10.790)   | -1.860<br>(2.500)      | >0.9999              | >0.9999                   | >0.9999                     |
| 1    | -4.924<br>(4.185)   | -1.748<br>(2.511)     | >0.9999             | 3.544<br>(3.019)     | 0.618<br>(2.259)       | >0.9999             | >0.9999                  | >0.9999                    | —                    | —                      | —                    | —                         | —                           |
| 3    | -1.120<br>(1.979)   | 1.740<br>(1.175)      | >0.9999             | 11.177<br>(4.953)    | 5.085<br>(2.245)       | >0.9999             | >0.9999                  | >0.9999                    | 18.830<br>(2.520)    | 9.270<br>(2.250)       | >0.9999              | 0.6163                    | 0.9608                      |
| 10   | -2.676<br>(3.261)   | 3.288<br>(3.909)      | >0.9999             | 29.928<br>(6.902)    | 16.006<br>(2.640)      | 0.2655              | <i>0.0060*</i>           | 0.2757                     | 46.545<br>(31.455)   | 19.610<br>(2.370)      | >0.9999              | <i>0.0029*</i>            | <i>0.0378*</i>              |
| 30   | -2.674<br>(3.597)   | 1.314<br>(2.719)      | >0.9999             | 41.128<br>(7.536)    | 22.395<br>(3.182)      | <i>0.0428*</i>      | <i>&lt;0.0001*</i>       | <i>0.0069*</i>             | 67.060<br>(32.940)   | 32.480<br>(4.050)      | 0.7002               | <i>&lt;0.0001*</i>        | <i>&lt;0.0001*</i>          |
| 100  | 0.370<br>(5.021)    | 2.088<br>(1.941)      | >0.9999             | 55.366<br>(8.052)    | 33.946<br>(7.294)      | <i>0.0131*</i>      | <i>&lt;0.0001*</i>       | <i>&lt;0.0001*</i>         | 100.00<br>(0.000)    | 74.085<br>(13.535)     | >0.9999              | <i>&lt;0.0001*</i>        | <i>&lt;0.0001*</i>          |
| 130  | —                   | —                     | —                   | —                    | —                      | —                   | —                        | —                          | 100.00<br>(0.000)    | 90.175<br>(9.825)      | >0.9999              | —                         | —                           |
| Mean | -2.475<br>(0.7711)  | 0.75<br>(0.9012)      | 0.4134              | 23.37<br>(9.152)     | 13.18<br>(5.462)       | <i>0.0345*</i>      | <i>0.0017*</i>           | <i>0.0042*</i>             | 54.14<br>(17.78)     | 37.29<br>(15.06)       | 0.2137               | <i>&lt;0.0001*</i>        | <i>0.0107*</i>              |
| Sum  | -14.85              | 4.50                  |                     | 140.2                | 79.08                  |                     |                          |                            | 324.8                | 223.8                  |                      |                           |                             |

1B. B6 Hypothermia

| Dose | PRE VEH Males (N=5) | PRE VEH Females (N=5) | PRE VEH/Sex P value | Pre THC Males (N=12) | Pre THC Females (N=13) | PRE THC/Sex P value | PRE Male VEH/THC P value | PRE Female VEH/THC P value | Post VEH Males (N=2) | Post VEH Females (N=2) | POST VEH/Sex P value | Pre/Post Male VEH P value | Pre/Post Female VEH P value |
|------|---------------------|-----------------------|---------------------|----------------------|------------------------|---------------------|--------------------------|----------------------------|----------------------|------------------------|----------------------|---------------------------|-----------------------------|
| 0    | -1.752<br>(0.554)   | 0.484<br>(0.491)      | 0.1697              | -1.526<br>(0.308)    | -0.016<br>(0.334)      | >0.9999             | >0.9999                  | >0.9999                    | 1.355<br>(1.615)     | 0.270<br>(0.270)       | >0.9999              | 0.1727                    | >0.9999                     |
| 1    | -1.856<br>(0.629)   | -0.310<br>(0.648)     | 0.7466              | -0.783<br>(0.335)    | -0.136<br>(0.456)      | >0.9999             | >0.9999                  | >0.9999                    | —                    | —                      | —                    | —                         | —                           |
| 3    | -2.758<br>(0.556)   | -0.840<br>(0.984)     | 0.3495              | -2.021<br>(0.568)    | -1.273<br>(0.486)      | >0.9999             | >0.9999                  | >0.9999                    | -3.080<br>(1.510)    | 1.485<br>(0.675)       | 0.8511               | >0.9999                   | 0.9266                      |
| 10   | -3.444<br>(0.769)   | -1.108<br>(0.736)     | 0.1334              | -8.246<br>(1.229)    | -7.288<br>(1.050)      | >0.9999             | 0.0133*                  | 0.0002*                    | -14.145<br>(2.075)   | -10.695<br>(2.315)     | >0.9999              | <0.0001*                  | <0.0001*                    |
| 30   | -2.968<br>(0.592)   | -2.394<br>(0.706)     | >0.9999             | -12.345<br>(1.265)   | -11.810<br>(1.181)     | >0.9999             | <0.0001*                 | <0.0001*                   | -13.845<br>(0.065)   | -11.630<br>(2.690)     | >0.9999              | <0.0001*                  | <0.0001*                    |
| 100  | -3.066<br>(0.977)   | -1.810<br>(0.536)     | >0.9999             | -15.475<br>(1.228)   | -15.863<br>(1.042)     | >0.9999             | <0.0001*                 | <0.0001*                   | -17.440<br>(0.410)   | -17.190<br>(3.680)     | >0.9999              | <0.0001*                  | <0.0001*                    |
| 130  | —                   | —                     | —                   | —                    | —                      | —                   | —                        | —                          | -16.645<br>(0.155)   | -18.950<br>(3.810)     | >0.9999              | —                         | —                           |
| Mean | -2.641<br>(0.28)    | -0.9963<br>(0.4209)   | 0.0813              | -6.733<br>(2.549)    | -6.064<br>(2.74)       | 0.4456              | 0.0021*                  | <0.0001*                   | -10.63<br>(3.193)    | -9.452<br>(3.514)      | 0.4513               | 0.0011*                   | 0.0021*                     |
| Sum  | -15.84              | -5.978                |                     | -40.4                | -36.39                 |                     |                          |                            | -63.8                | -56.71                 |                      |                           |                             |

## Supplementary Table 2 Sex-differences in acute antinociception and hypothermia in DBA mice receiving vehicle

Data represent the Means and SEM (standard error of the mean) in Percent Maximum Possible Effect (%MPE) for Tail Flick (A) and Percent Change in Body Temperature (% $\Delta$ BT) for Hypothermia (B) in DBA Mice. For the first two columns (PRE VEH), the mean and SEM for each sex is given for each dose following the administration of vehicle (VEH only) with the p value comparing sex within each dose listed to the right. For the next set of columns, the mean and SEM for mice getting THC (0-100 mg/kg; PRE THC) is listed with the P value to the right comparing sex within each dose with subsequent sets of p values comparing naïve mice getting VEH to those getting THC within each sex. Following seven days of once-daily treatment with vehicle (VEH) or 30 mg/kg THC, all mice were tested across a range of doses (0-130 mg/kg) of THC to generate post (POST) dose-response curves. The mean and SEM for each dose is listed for mice that received vehicle for 7 days prior to being assessed for the post dose-response curve of THC. P values assess sex differences in the post dose-response curve within each dose and within each sex compare differences between Pre and Post curves in VEH mice. \*Significant differences are italicized; lines denote instances where values or comparisons are not applicable

### 2A. DBA Tail-flick

| Dose | PRE VEH Males (N=5) | PRE VEH Females (N=5) | PRE VEH/Sex P value | Pre THC Males (N=10) | Pre THC Females (N=10) | PRE THC/Sex P value | PRE Male VEH/THC P value | PRE Female VEH/THC P value | Post VEH Males (N=2) | Post VEH Females (N=2) | POST VEH/Sex P value | Pre/Post Male VEH P value | Pre/Post Female VEH P value |
|------|---------------------|-----------------------|---------------------|----------------------|------------------------|---------------------|--------------------------|----------------------------|----------------------|------------------------|----------------------|---------------------------|-----------------------------|
| 0    | -3.616<br>(3.014)   | 0.104<br>(1.909)      | >0.9999             | -2.347<br>(1.762)    | -4.590<br>(3.029)      | 0.9997              | >0.9999                  | 0.9893                     | -1.200<br>(0.360)    | -0.840<br>(1.460)      | >0.9999              | >0.9999                   | >0.9999                     |
| 1    | -5.372<br>(2.210)   | -4.448<br>(1.508)     | >0.9999             | -6.264<br>(2.162)    | -8.028<br>(3.029)      | >0.9999             | >0.9999                  | 0.9975                     | —                    | —                      | —                    | —                         | —                           |
| 3    | -1.602<br>(1.767)   | 3.732<br>(1.831)      | >0.9999             | -1.798<br>(2.887)    | -3.463<br>(2.805)      | >0.9999             | >0.9999                  | >0.9999                    | 46.285<br>(35.495)   | 19.150<br>(9.490)      | 0.9022               | <i>0.0185*</i>            | <i>0.0187*</i>              |
| 10   | 4.260<br>(4.910)    | 6.394<br>(3.488)      | >0.9999             | 11.403<br>(2.273)    | 21.730<br>(5.931)      | 0.5588              | 0.8852                   | 0.2316                     | 65.820<br>(34.180)   | 55.170<br>(2.710)      | 0.9991               | <i>0.0019*</i>            | <i>&lt;0.0001*</i>          |
| 30   | 9.662<br>(4.463)    | 3.620<br>(3.480)      | >0.9999             | 31.255<br>(5.409)    | 49.795<br>(5.398)      | <i>0.0404*</i>      | <i>0.0144*</i>           | <i>&lt;0.0001*</i>         | 72.655<br>(27.345)   | 67.195<br>(19.215)     | >0.9999              | <i>0.0015*</i>            | <i>&lt;0.0001*</i>          |
| 100  | 4.856<br>(4.408)    | 2.938<br>(2.004)      | >0.9999             | 62.662<br>(8.283)    | 69.431<br>(7.849)      | 0.8979              | <i>&lt;0.0001*</i>       | <i>&lt;0.0001*</i>         | 91.610<br>(8.390)    | 90.295<br>(9.705)      | >0.9999              | <i>&lt;0.0001*</i>        | <i>&lt;0.0001*</i>          |
| 130  | —                   | —                     | —                   | —                    | —                      | —                   | —                        | —                          | 88.480<br>(11.520)   | 86.390<br>(13.610)     | >0.9999              | —                         | —                           |
| Mean | 1.365<br>(2.369)    | 0.8127<br>(1.755)     | 0.8436              | 15.82<br>(10.92)     | 20.81<br>(13.26)       | 0.2086              | <i>0.0069*</i>           | <i>0.0003*</i>             | 60.61<br>(14.07)     | 52.89<br>(15.01)       | 0.7559               | <i>0.0075*</i>            | <i>0.0003*</i>              |
| Sum  | 8.188               | 4.876                 |                     | 94.91                | 124.9                  |                     |                          |                            | 363.7                | 317.4                  |                      |                           |                             |

2B. DBA Hypothermia

| Dose | PRE<br>VEH<br>Males<br>(N=5) | PRE<br>VEH<br>Females<br>(N=5) | PRE<br>VEH/Sex<br>P value | Pre THC<br>Males<br>(N=10) | Pre<br>THC<br>Females<br>(N=10) | PRE<br>THC/Sex<br>P value | PRE<br>Male<br>VEH/THC<br>P value | PRE<br>Female<br>VEH/THC<br>P value | Post<br>VEH<br>Males<br>(N=2) | Post<br>VEH<br>Females<br>(N=2) | POST<br>VEH/Sex<br>P value | Pre/Post<br>Male<br>VEH<br>P value | Pre/Post<br>Female<br>VEH<br>P value |
|------|------------------------------|--------------------------------|---------------------------|----------------------------|---------------------------------|---------------------------|-----------------------------------|-------------------------------------|-------------------------------|---------------------------------|----------------------------|------------------------------------|--------------------------------------|
| 0    | 0.184<br>(0.813)             | 0.386<br>(0.673)               | >0.9999                   | 0.083<br>(0.0416)          | -0.045<br>(0.437)               | >0.9999                   | >0.9999                           | 0.9999                              | -0.240<br>(2.130)             | 1.690<br>(2.220)                | 0.9964                     | 0.9998                             | 0.9273                               |
| 1    | -0.194<br>(0.674)            | 0.964<br>(0.770)               | 0.7228                    | 1.076<br>(0.422)           | 1.197<br>(0.474)                | >0.9999                   | 0.9611                            | >0.9999                             | —                             | —                               | —                          | —                                  | —                                    |
| 3    | -1.532<br>(0.397)            | 0.852<br>(0.318)               | 0.0530                    | 1.341<br>(0.389)           | 1.574<br>(0.598)                | >0.9999                   | 0.3500                            | 0.9979                              | -3.915<br>(3.655)             | 1.955<br>(1.955)                | 0.5818                     | 0.6444                             | 0.9631                               |
| 10   | -1.756<br>(0.213)            | 0.376<br>(0.721)               | 0.1073                    | -4.020<br>(1.452)          | -4.686<br>(1.561)               | 0.9982                    | 0.6246                            | 0.0092*                             | -8.700<br>(2.380)             | -1.410<br>(1.940)               | 0.3530                     | 0.0028*                            | 0.7780                               |
| 30   | -0.642<br>(0.531)            | -0.582<br>(0.307)              | >0.9999                   | -10.505<br>(1.522)         | -13.057<br>(1.234)              | 0.4102                    | <0.0001*                          | <0.0001*                            | -9.065<br>(0.145)             | -9.865<br>(2.605)               | >0.9999                    | 0.0003*                            | <0.0001*                             |
| 100  | 0.108<br>(1.073)             | -1.272<br>(0.305)              | 0.5413                    | -12.127<br>(1.220)         | -13.084<br>(1.311)              | 0.9870                    | <0.0001*                          | <0.0001*                            | -18.705<br>(2.915)            | -12.330<br>(3.310)              | 0.4947                     | <0.0001*                           | <0.0001*                             |
| 130  | —                            | —                              | —                         | —                          | —                               | —                         | —                                 | —                                   | -18.990<br>(4.250)            | -12.395<br>(0.455)              | 0.4584                     | —                                  | —                                    |
| Mean | -0.6387<br>(0.340)           | -0.1207<br>(0.357)             | 0.1531                    | -4.025<br>(2.445)          | -4.684<br>(2.804)               | 0.4690                    | 0.0029*                           | 0.0002*                             | -9.936<br>(3.117)             | -5.393<br>(2.812)               | 0.1310                     | 0.0003*                            | 0.0016*                              |
| Sum  | -3.832                       | 0.724                          |                           | -24.15                     | -28.10                          |                           |                                   |                                     | -59.62                        | -32.36                          |                            |                                    |                                      |

### Supplementary Table 3 Sex-differences in acute antinociception and hypothermia in AKR mice receiving vehicle

Data represent the Means and SEM (standard error of the mean) in Percent Maximum Possible Effect (%MPE) for Tail Flick (A) and Percent Change in Body Temperature (% $\Delta$ BT) for Hypothermia (B) in AKR Mice. For the first two columns (PRE VEH), the mean and SEM for each sex is given for each dose following the administration of vehicle (VEH only) with the p value comparing sex within each dose listed to the right. For the next set of columns, the mean and SEM for mice getting THC (0-100 mg/kg; PRE THC) is listed with the P value to the right comparing sex within each dose with subsequent sets of p values comparing naïve mice getting VEH to those getting THC within each sex. Following seven days of once-daily treatment with vehicle (VEH) or 30 mg/kg THC, all mice were tested across a range of doses (0-130 mg/kg) of THC to generate post (POST) dose-response curves. The mean and SEM for each dose is listed for mice that received vehicle for 7 days prior to being assessed for the post dose-response curve of THC. P values assess sex differences in the post dose-response curve within each dose and within each sex compare differences between Pre and Post curves in VEH mice. \*Significant differences are italicized; lines denote instances where values or comparisons are not applicable

#### 3A. AKR Tail-flick

| Dose | PRE VEH Males (N=5) | PRE VEH Females (N=5) | PRE VEH/Sex P value | Pre THC Males (N=10) | Pre THC Females (N=10) | PRE THC/Sex P value | PRE Male VEH/THC P value | PRE Female VEH/THC P value | Post VEH Males (N=4) | Post VEH Females (N=4) | POST VEH/Sex P value | Pre/Post Male VEH P value | Pre/Post Female VEH P value |
|------|---------------------|-----------------------|---------------------|----------------------|------------------------|---------------------|--------------------------|----------------------------|----------------------|------------------------|----------------------|---------------------------|-----------------------------|
| 0    | 5.256<br>(4.236)    | 3.992<br>(3.456)      | 0.9998              | -2.434<br>(2.362)    | 1.180<br>(1.297)       | 0.9946              | 0.8906                   | 0.9983                     | 1.688<br>(5.315)     | -7.840<br>(11.075)     | 0.9828               | 0.9901                    | 0.7606                      |
| 1    | 7.648<br>(2.603)    | 3.290<br>(1.965)      | 0.9366              | 6.773<br>(3.189)     | 0.041<br>(2.597)       | 0.8874              | >0.9999                  | 0.9961                     | —                    | —                      | —                    | —                         | —                           |
| 3    | 9.582<br>(3.948)    | 2.714<br>(2.479)      | 0.6461              | 11.477<br>(3.810)    | 1.793<br>(2.345)       | 0.5981              | >0.9999                  | >0.9999                    | 6.173<br>(5.967)     | -2.520<br>(7.884)      | 0.9893               | 0.9943                    | 0.9906                      |
| 10   | 4.550<br>(5.088)    | 5.394<br>(1.939)      | >0.9999             | 18.082<br>(2.611)    | 14.393<br>(4.217)      | 0.9940              | 0.4143                   | 0.6310                     | -2.658<br>(7.212)    | -0.950<br>(13.115)     | >0.9999              | 0.8661                    | 0.9779                      |
| 30   | 7.696<br>(4.889)    | 4.542<br>(1.746)      | 0.9869              | 13.583<br>(1.978)    | 27.535<br>(4.819)      | 0.1918              | 0.9725                   | <i>0.0025*</i>             | 12.938<br>(6.016)    | 29.150<br>(14.002)     | 0.8150               | 0.9614                    | 0.0956                      |
| 100  | 10.404<br>(3.156)   | 7.144<br>(3.068)      | 0.9844              | 39.609<br>(10.531)   | 22.975<br>(6.998)      | 0.0713              | <i>0.0019*</i>           | 0.0763                     | 22.898<br>(6.252)    | 9.143<br>(7.021)       | 0.9036               | 0.3977                    | >0.9999                     |
| 130  | —                   | —                     | —                   | —                    | —                      | —                   | —                        | —                          | 11.015<br>(8.646)    | 18.713<br>(16.179)     | 0.9944               | —                         | —                           |
| Mean | 7.568<br>(0.9201)   | 4.513<br>(0.6507)     | 0.3907              | 14.52<br>(5.773)     | 11.32<br>(4.930)       | 0.3103              | 0.1063                   | <i>0.0376*</i>             | 8.675<br>(3.694)     | 7.616<br>(5.786)       | 0.9251               | 0.9119                    | 0.9393                      |
| Sum  | 45.41               | 27.08                 |                     | 87.09                | 67.92                  |                     |                          |                            | 52.05                | 45.70                  |                      |                           |                             |

3B. AKR Hypothermia

| Dose | PRE<br>VEH<br>Males<br>(N=5) | PRE<br>VEH<br>Females<br>(N=5) | PRE<br>VEH/Sex<br>P value | Pre THC<br>Males<br>(N=10) | Pre<br>THC<br>Females<br>(N=10) | PRE<br>THC/Sex<br>P value | PRE<br>Male<br>VEH/THC<br>P value | PRE<br>Female<br>VEH/THC<br>P value | Post<br>VEH<br>Males<br>(N=4) | Post<br>VEH<br>Females<br>(N=4) | POST<br>VEH/Sex<br>P value | Pre/Post<br>Male<br>VEH<br>P value | Pre/Post<br>Female<br>VEH<br>P value |
|------|------------------------------|--------------------------------|---------------------------|----------------------------|---------------------------------|---------------------------|-----------------------------------|-------------------------------------|-------------------------------|---------------------------------|----------------------------|------------------------------------|--------------------------------------|
| 0    | 1.256<br>(0.698)             | -0.576<br>(0.304)              | 0.1622                    | -0.657<br>(0.495)          | -0.369<br>(0.333)               | 0.9999                    | 0.2254                            | >0.9999                             | -7.735<br>(0.827)             | -12.705<br>(3.478)              | 0.6499                     | <0.0001*                           | <0.0001*                             |
| 1    | 0.648<br>(0.648)             | -0.362<br>(0.431)              | 0.7762                    | -1.514<br>(0.334)          | -0.551<br>(0.381)               | 0.9261                    | 0.1240                            | >0.9999                             | —                             | —                               | —                          | —                                  | —                                    |
| 3    | 0.172<br>(0.844)             | -0.998<br>(0.323)              | 0.6416                    | -2.595<br>(0.441)          | -0.949<br>(0.481)               | 0.5135                    | 0.0218*                           | >0.9999                             | 3.465<br>(2.111)              | 0.220<br>(2.026)                | 0.9285                     | 0.3504                             | 0.9896                               |
| 10   | -1.022<br>(0.415)            | -0.992<br>(0.465)              | >0.9999                   | -6.507<br>(0.391)          | -3.310<br>(0.793)               | 0.0146*                   | <0.0001*                          | 0.3766                              | 1.663<br>(2.437)              | -4.445<br>(1.446)               | 0.4198                     | 0.5671                             | 0.5336                               |
| 30   | 0.120<br>(0.798)             | -1.472<br>(0.391)              | 0.2940                    | -7.649<br>(0.556)          | -4.696<br>(0.939)               | 0.0297*                   | <0.0001*                          | 0.0833                              | -2.560<br>(2.464)             | -7.305<br>(1.527)               | 0.6954                     | 0.5688                             | 0.0758                               |
| 100  | -0.264<br>(0.710)            | -1.528<br>(0.542)              | 0.5577                    | -14.448<br>(0.895)         | -14.980<br>(1.600)              | 0.9963                    | <0.0001*                          | <0.0001*                            | -7.735<br>(0.827)             | -12.705<br>(3.478)              | 0.6499                     | 0.0013*                            | <0.0001*                             |
| 130  | —                            | —                              | —                         | —                          | —                               | —                         | —                                 | —                                   | -8.635<br>(0.531)             | -16.290<br>(4.619)              | 0.1862                     | —                                  | —                                    |
| Mean | 0.1517<br>(0.3172)           | -0.9980<br>(0.1904)            | 0.1645                    | -5.562<br>(2.109)          | -4.143<br>(2.279)               | 0.0554                    | <0.0001*                          | 0.0029*                             | -3.590<br>(2.147)             | -8.872<br>(2.511)               | 0.0977                     | 0.1220                             | 0.0098*                              |
| Sum  | 0.9100                       | -5.928                         |                           | -33.37                     | -24.86                          |                           |                                   |                                     | -21.54                        | -53.23                          |                            |                                    |                                      |

#### Supplementary Table 4 Sex-differences in acute antinociception and hypothermia in CBA mice receiving vehicle

Data represent the Means and SEM (standard error of the mean) in Percent Maximum Possible Effect (%MPE) for Tail Flick (A) and Percent Change in Body Temperature (% $\Delta$ BT) for Hypothermia (B) in CBA Mice. For the first two columns (PRE VEH), the mean and SEM for each sex is given for each dose following the administration of vehicle (VEH only) with the p value comparing sex within each dose listed to the right. For the next set of columns, the mean and SEM for mice getting THC (0-100 mg/kg; PRE THC) is listed with the P value to the right comparing sex within each dose with subsequent sets of p values comparing naïve mice getting VEH to those getting THC within each sex. Following seven days of once-daily treatment with vehicle (VEH) or 30 mg/kg THC, all mice were tested across a range of doses (0-130 mg/kg) of THC to generate post (POST) dose-response curves. The mean and SEM for each dose is listed for mice that received vehicle for 7 days prior to being assessed for the post dose-response curve of THC. P values assess sex differences in the post dose-response curve within each dose and within each sex compare differences between Pre and Post curves in VEH mice. \*Significant differences are italicized; lines denote instances where values or comparisons are not applicable

#### 4A. CBA Tail-flick

| Dose | PRE VEH Males (N=5) | PRE VEH Females (N=5) | PRE VEH/Sex P value | Pre THC Males (N=11) | Pre THC Females (N=11) | PRE THC/Sex P value | PRE Male VEH/THC P value | PRE Female VEH/THC P value | Post VEH Males (N=4) | Post VEH Females (N=4) | POST VEH/Sex P value | Pre/Post Male VEH P value | Pre/Post Female VEH P value |
|------|---------------------|-----------------------|---------------------|----------------------|------------------------|---------------------|--------------------------|----------------------------|----------------------|------------------------|----------------------|---------------------------|-----------------------------|
| 0    | 6.520<br>(6.469)    | 6.340<br>(4.145)      | >0.9999             | -2.936<br>(5.261)    | 3.555<br>(7.319)       | 0.9766              | 0.8891                   | >0.9999                    | 10.250<br>(0.550)    | -32.550<br>(21.350)    | 0.3821               | 0.7383                    | 0.7657                      |
| 1    | 9.640<br>(2.205)    | 6.300<br>(7.039)      | 0.9997              | 7.209<br>(3.268)     | 9.727<br>(6.168)       | 0.9999              | >0.9999                  | 0.9999                     | —                    | —                      | —                    | —                         | —                           |
| 3    | 19.040<br>(4.611)   | 8.000<br>(8.644)      | 0.8645              | 21.855<br>(5.519)    | 23.745<br>(7.890)      | >0.9999             | 0.9998                   | 0.7036                     | 21.000<br>(11.800)   | 24.150<br>(8.050)      | >0.9999              | 0.5786                    | 0.3045                      |
| 10   | 24.218<br>(4.867)   | 1.670<br>(8.778)      | 0.1745              | 21.408<br>(3.973)    | 45.771<br>(8.306)      | <i>0.0406*</i>      | 0.9998                   | <i>0.0019*</i>             | 35.400<br>(15.700)   | 18.950<br>(10.550)     | 0.9783               | 0.9920                    | <i>0.0022*</i>              |
| 30   | 21.120<br>(7.891)   | 7.960<br>(5.902)      | 0.7419              | 68.664<br>(9.134)    | 63.109<br>(6.690)      | 0.9895              | < <i>0.0001*</i>         | < <i>0.0001*</i>           | 60.845<br>(5.515)    | 68.175<br>(31.825)     | 0.9997               | <i>0.0003*</i>            | <i>0.0032*</i>              |
| 100  | 17.340<br>(5.445)   | 6.400<br>(13.574)     | 0.8693              | 93.664<br>(4.551)    | 92.927<br>(3.818)      | >0.9999             | < <i>0.0001*</i>         | < <i>0.0001*</i>           | 74.800<br>(10.000)   | 55.600<br>(17.400)     | 0.9546               | < <i>0.0001*</i>          | < <i>0.0001*</i>            |
| 130  | —                   | —                     | —                   | —                    | —                      | —                   | —                        | —                          | 90.750<br>(9.250)    | 39.150<br>(19.750)     | 0.2073               | —                         | —                           |
| Mean | 16.31<br>(2.796)    | 6.112<br>(0.9466)     | 0.2551              | 34.98<br>(15.43)     | 39.81<br>(14.00)       | 0.3646              | <i>0.0008*</i>           | <i>0.0014*</i>             | 48.84<br>(12.93)     | 28.91<br>(14.44)       | 0.0825               | <i>0.0028*</i>            | <i>0.0002*</i>              |
| Sum  | 97.88               | 36.67                 |                     | 209.9                | 238.8                  |                     |                          |                            | 293.0                | 173.5                  |                      |                           |                             |

4B. CBA Hypothermia

| Dose | PRE<br>VEH<br>Males<br>(N=5) | PRE<br>VEH<br>Females<br>(N=5) | PRE<br>VEH/Sex<br>P value | Pre THC<br>Males<br>(N=11) | Pre<br>THC<br>Females<br>(N=11) | PRE<br>THC/Sex<br>P value | PRE<br>Male<br>VEH/THC<br>P value | PRE<br>Female<br>VEH/THC<br>P value | Post<br>VEH<br>Males<br>(N=4) | Post<br>VEH<br>Females<br>(N=4) | POST<br>VEH/Sex<br>P value | Pre/Post<br>Male<br>VEH<br>P value | Pre/Post<br>Female<br>VEH<br>P value |
|------|------------------------------|--------------------------------|---------------------------|----------------------------|---------------------------------|---------------------------|-----------------------------------|-------------------------------------|-------------------------------|---------------------------------|----------------------------|------------------------------------|--------------------------------------|
| 0    | -1.820<br>(1.102)            | 0.440<br>(1.183)               | 0.5271                    | -1.500<br>(0.490)          | 0.091<br>(0.272)                | 0.4809                    | >0.9999                           | 0.9998                              | 1.575<br>(0.733)              | -0.400<br>(0.593)               | 0.7144                     | 0.1177                             | 0.6504                               |
| 1    | -1.520<br>(0.840)            | 0.180<br>(1.231)               | 0.8014                    | -1.109<br>(0.547)          | 0.618<br>(0.283)                | 0.3834                    | 0.9998                            | 0.9992                              | —                             | —                               | —                          | —                                  | —                                    |
| 3    | -1.280<br>(0.522)            | -0.340<br>(0.969)              | 0.9862                    | -1.427<br>(0.565)          | 0.800<br>(0.260)                | 0.1323                    | >0.9999                           | 0.8928                              | 2.925<br>(0.125)              | 1.150<br>(0.902)                | 0.8014                     | 0.4720                             | 0.9997                               |
| 10   | -2.020<br>(0.917)            | -0.880<br>(0.993)              | 0.9639                    | -4.018<br>(0.641)          | -2.645<br>(0.762)               | 0.6475                    | 0.5753                            | 0.5292                              | 1.025<br>(1.424)              | -1.225<br>(0.634)               | 0.5825                     | 0.0321*                            | 0.0345*                              |
| 30   | -1.820<br>(1.386)            | -0.720<br>(0.887)              | 0.9696                    | -7.355<br>(1.124)          | -7.655<br>(0.996)               | 0.9998                    | 0.0004*                           | <0.0001*                            | -2.300<br>(1.304)             | -2.225<br>(0.545)               | >0.9999                    | <0.0001*                           | <0.0001*                             |
| 100  | -2.280<br>(1.058)            | -1.340<br>(0.590)              | 0.9862                    | -8.564<br>(0.958)          | -9.436<br>(0.632)               | 0.9375                    | <0.0001*                          | <0.0001*                            | -5.500<br>(1.543)             | -6.175<br>(1.573)               | 0.9981                     | <0.0001*                           | <0.0001*                             |
| 130  | —                            | —                              | —                         | —                          | —                               | —                         | —                                 | —                                   | -2.625<br>(1.238)             | -4.200<br>(0.698)               | 0.8743                     | —                                  | —                                    |
| Mean | -1.79<br>(0.1447)            | -0.4433<br>(0.2739)            | 0.3419                    | -3.995<br>(1.333)          | -3.038<br>(1.828)               | 0.1197                    | 0.0450*                           | 0.0031*                             | -0.8167<br>(1.298)            | -2.179<br>(1.083)               | 0.0267*                    | <0.0001*                           | <0.0001*                             |
| Sum  | -10.74                       | -2.66                          |                           | -23.97                     | -18.23                          |                           |                                   |                                     | -4.90                         | -13.08                          |                            |                                    |                                      |
